# Supplementary material for: SATB2‐LEMD2 interaction links nuclear shape plasticity to regulation of cognition‐related genes
Source: PubMed Central journal article supplement (PMC7849313; doi:10.15252/embj.2019103701), 2020-12-15
Supplement: EMBJ-40-e103701-s001.pdf [file EMBJ-40-e103701-s001.pdf]

## Table of Contents:

1. Appendix Figure S1  
Phenotype of *Satb2*<sup>flx/flx</sup> and *Satb2*<sup>NesCre</sup>cKO mouse brain
2. Appendix Figure S2  
Coomassie Brilliant Blue Staining of purified GST-hybrid proteins
3. Appendix Figure S3  
AP bursting increases nuclear phospho-MSK1 immunoreactivity in both *Satb2*<sup>flx/flx</sup> and *Satb2*<sup>NesCre</sup> hippocampal neurons

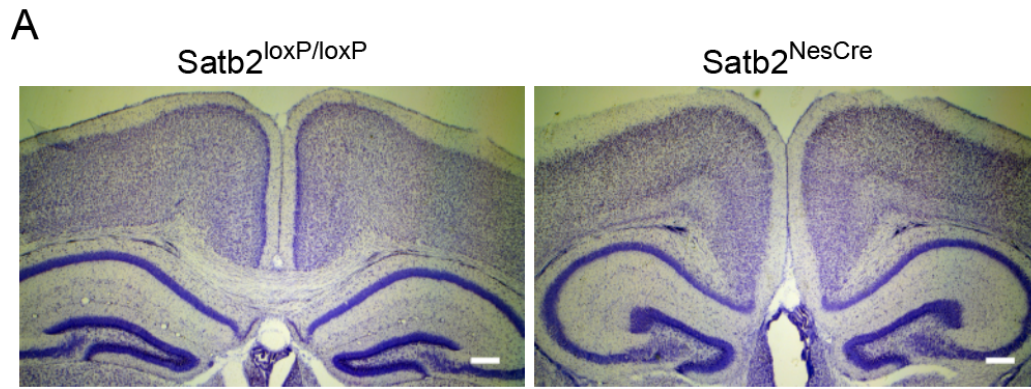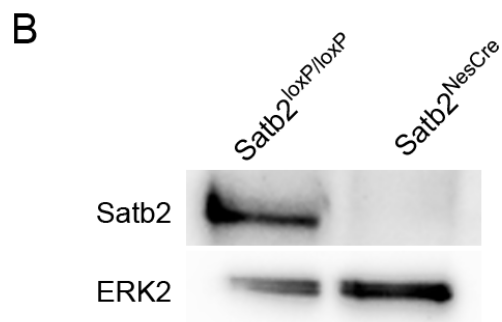

**Appendix Figure S1.: Phenotype of  $Satb2^{flx/flx}$  and  $Satb2^{NesCre}$  cKO mouse brain**

- A** Nissl-staining of coronal brain sections from P15  $Satb2^{flx/flx}$  (left panel) and  $Satb2^{NesCre}$  knockout mice (right panel).  $Satb2^{NesCre}$  mice (Cera et al., 2019) lack corpus callosum as has been described for  $Satb2$ -germ line knockout mutants (Alcamo et al., 2008; Britanova et al., 2008). Scale bar: 200  $\mu$ m.
- B** Immunoblotting analysis for  $Satb2$  in DIV7 primary hippocampal cultures derived from  $Satb2^{NesCre}$  or  $Satb2^{loxP/loxP}$  mice demonstrates absence of detectable  $Satb2$  immunoreactivity in cultures from knockout animals compared to cultures from floxed littermate control mice.

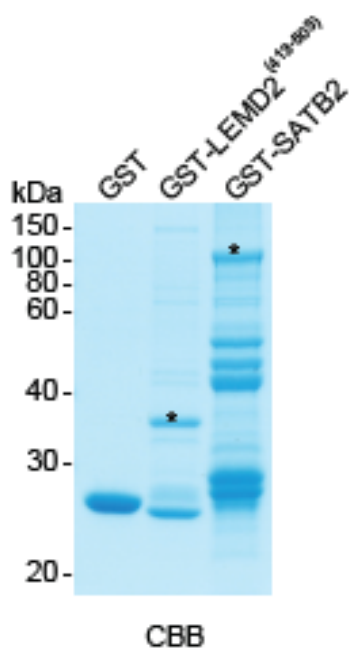

**Appendix Figure S2.: Coomassie Brilliant Blue Staining of purified GST-hybrid proteins**

Coomassie Brilliant Blue (CBB)-stained gel of protein fractions obtained after affinity purification of GST-hybrid proteins is shown. Asterisks indicate the GST-SATB2 and GST-LEMD2<sup>(413-503)</sup> hybrid proteins.

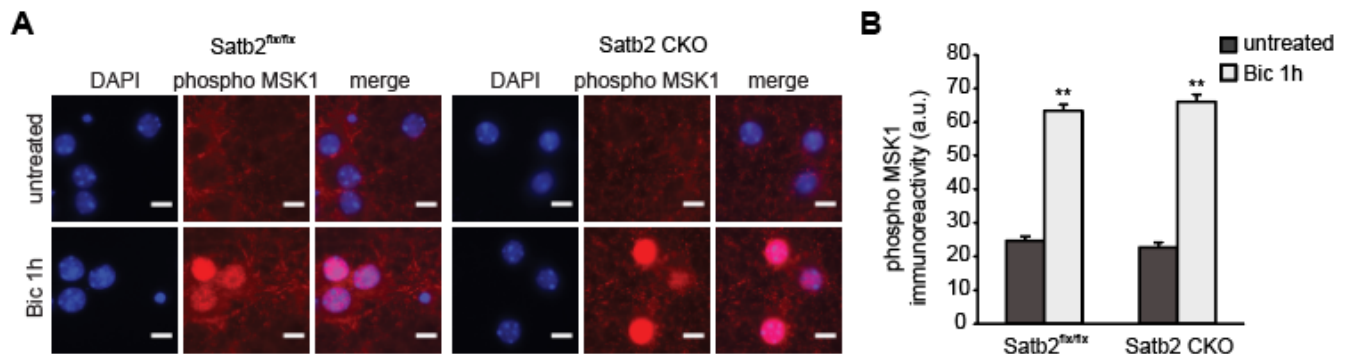

**Appendix Figure S3.: AP bursting increases nuclear phospho-MSK1 immunoreactivity in both Satb2<sup>flx/flx</sup> and Satb2-deficient hippocampal neurons**

Immunocytochemical analysis of the phosphorylation of MSK1 at threonine 581 following Bic-induced AP bursting for 1 h in primary hippocampal cultures derived from neonatal Satb2<sup>flx/flx</sup> mice and Satb2<sup>flx/flx</sup>::Nes-Cre mice. The mean nuclear phospho-MSK1 immunoreactivity was measured as absolute 8 bit gray levels. DAPI staining was used to identify nuclei. Representative images **(A)** and the quantitative analysis **(B)** are shown. AP bursting caused a significant increase in the nuclear phospho MSK1 immunoreactivity in both Satb2<sup>flx/flx</sup> and Satb2<sup>flx/flx</sup>::Nes-Cre cultures,  $n = 3$  independent primary cultures, two-way ANOVA; main effect of treatment,  $F_{1,8} = 46.48$ ,  $p = 0.0001$ ; main effect of genotype,  $F_{1,8} = 0.003$ ,  $p = 0.95$ , not significant interaction,  $F_{1,8} = 0.15$ ,  $p = 0.7081$ ; untreated vs. Bic-treated Satb2<sup>flx/flx</sup> cultures  $p = 0.0081$ ; untreated vs. Bic-treated Satb2<sup>flx/flx</sup>::Nes-Cre cultures  $p = 0.0041$ , adjustment for multiple comparisons: Tukey's. Number of analyzed nuclei: 532 (Satb2<sup>flx/flx</sup> cultures, untreated); 461 (Satb2<sup>flx/flx</sup> cultures, Bic-treated); 520 (Satb2<sup>flx/flx</sup>::Nes-Cre cultures, untreated), 492 (Satb2<sup>flx/flx</sup>::Nes-Cre, Bic-treated). Data are presented as mean  $\pm$  SEM, \*\* $p < 0.01$ , Scale bar, 10  $\mu$ m.
