# Supplementary material for: SATB2‐LEMD2 interaction links nuclear shape plasticity to regulation of cognition‐related genes
Source: PubMed Central journal article supplement (PMC7849313; doi:10.15252/embj.2019103701), 2020-12-15
Supplement: EMBJ-40-e103701-s002.pdf [file EMBJ-40-e103701-s002.pdf]

## Expanded View Figures

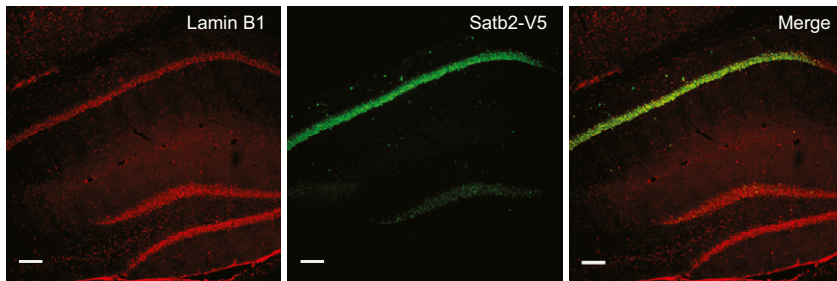

**Figure EV1. Re-introduction of V5-tagged SATB2 into the adult dorsal hippocampus of *Satb2* conditional mutants.**

rAAV8-hSyn-*Satb2*-V5 virus was injected into the dorsal hippocampus of *Satb2*<sup>CamKCre</sup> knockout mice. Lamin B2 staining (left panel) was used to mark cell nuclei in hippocampus. V5 immunoreactivity was used to detect expression of SATB2-V5 in hippocampus (middle panel). Overlay of both pictures (right panel) demonstrates re-expression of SATB2 in CA1-neuronal nuclei in SATB2-deficient mice. Representative images are shown. Scale bars: 100  $\mu$ m.

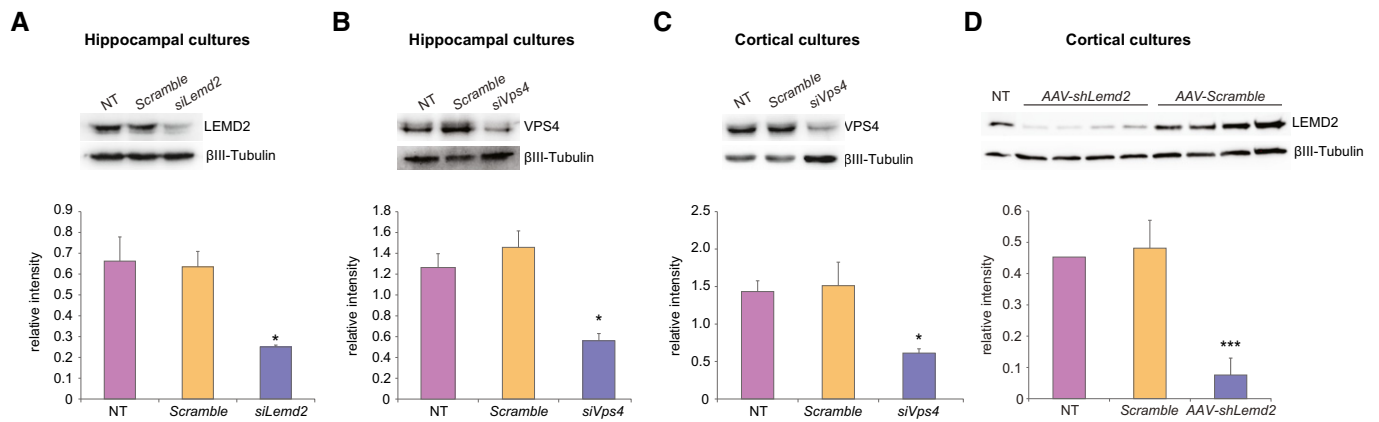

**Figure EV2. Gene silencing of *Lemd2*, *Vps4a* and *Vps4b* in primary neuronal cultures.**

- A** Gene silencing of *Lemd2* in hippocampal cultures by siRNA. Upper panel: Representative Western blot for LEMD2 protein in primary hippocampal neurons, NT (non-transfected), *Scramble* (transfected with control siRNA), *siLemd2* (transfected with siRNA against *Lemd2*). Lower panel: Western blot quantification of LEMD2 in hippocampal cultures,  $n = 4$  independent primary cultures. One-way Welch's ANOVA followed by Tukey *post hoc* test,  $F_{2,9} = 16.783$ ,  $P = 0.011$ , NT vs *siLemd2*  $P = 0.013$ , *Scramble* vs *siLemd2*  $P = 0.019$ . Data are presented as mean  $\pm$  SEM, \* $P < 0.05$  compared to NT.
- B** Gene silencing of *Vps4* in hippocampal cultures by siRNA. Upper panel: Representative Western blot for VPS4 protein level in primary hippocampal neurons. NT (non-transfected), *Scramble* (transfected with control siRNA), *siVps4* (transfected with siRNAs against *Vps4a* and *Vps4b*). Lower panel: Western blot quantification of VPS4 protein level in primary hippocampal cultures,  $n = 3$  independent experiments, one-way Welch's ANOVA followed by Tukey *post hoc* test,  $F_{2,6} = 14.226$ ,  $P = 0.027$ , NT vs *siVps4*  $P = 0.063$ , *Scramble* vs *siLemd2*  $P = 0.045$ . Data are presented as mean  $\pm$  SEM, \* $P < 0.05$  compared to *scramble*.
- C** Gene silencing of *Vps4* in cortical cultures by siRNA. Upper panel: Representative Western blot for VPS4 protein level in primary cortical neurons. NT (non-transfected), *scramble* (transfected with control siRNA), *Vps4* (transfected with siRNA against *Vps4a* and *Vps4b*). Lower panel: Western blot quantification of VPS4 protein level in primary cortical cultures,  $n = 3$  independent experiments, one-way ANOVA followed by Tukey *post hoc* test,  $F_{2,8} = 9.423$ ,  $P = 0.014$ , NT vs *siVps4*  $P = 0.041$ , *scramble* vs *siVps4*  $P = 0.015$ . Data are presented as mean  $\pm$  SEM, \* $P < 0.05$  compared to NT.
- D** Gene silencing of *Lemd2* in cortical cultures by shRNA. Upper panel: Western blot for LEMD2 in primary cortical neurons, NT (non-transfected), *Scramble* (transfected with control shRNA), AAV-*shLemd2* (transfected with shRNA against *Lemd2*). Lower panel: Western blot quantification of LEMD2 protein level,  $n = 4$  independent experiments, unpaired *t*-test,  $t(6) = 5.98$ ,  $P = 0.000979$ . Data are presented as mean  $\pm$  SEM, \*\*\* $P < 0.001$  compared to *Scramble*.

Source data are available online for this figure.

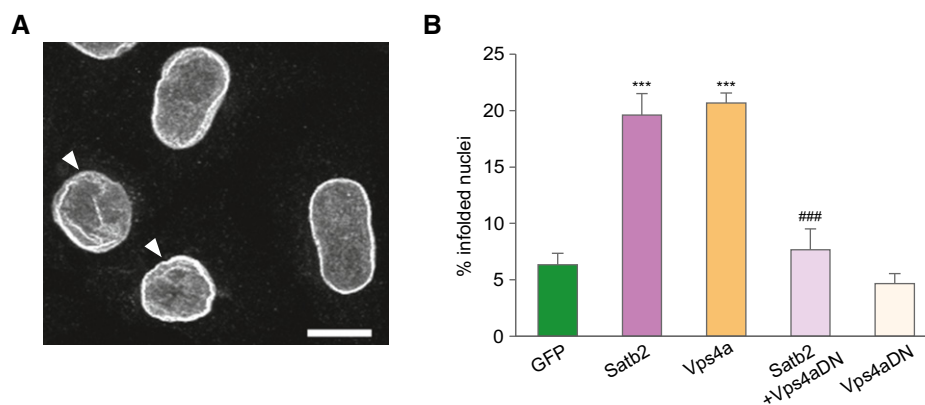

**Figure EV3. 5 ESCRT-III/VPS4 complex is required for SATB2-triggered nuclear infolding formation in HeLa cells.**

A Confocal image (z-axis projection of confocal image stack) of HeLa cell nuclei immunostained for Lamin B2. Arrowheads indicate infolded nuclei. Scale bar: 10  $\mu$ m.

B Percentage of infolded nuclei in HeLa cells after ectopic expression of *Satb2*, *Vps4a*-GFP, a dominant-negative *Vps4a* mutant fused to GFP (*Vps4aDN*-GFP), and a combination of *Satb2* and *Vps4aDN*-GFP. The number of infolded nuclei is significantly increased in both *Satb2*- and *Vps4a*-transfected cells compared with GFP-transfected cells. Expression of the dominant-negative *Vps4a* mutant abolished the increase in the number of infolded nuclei induced by SATB2,  $n = 3$ –5 independent experiments, ANOVA followed by Tukey *post hoc* test,  $F_{4,14} = 25.4$ , GFP vs *Satb2*,  $P < 0.0001$ , GFP vs *Vps4a*,  $P < 0.0001$ , *Satb2* vs *Satb2* + *Vps4aDN*,  $P = 0.0006$ . Number of analyzed nuclei: 521 (GFP), 586 (*Satb2*), 302 (*Vps4a*), 345 (*Satb2*/*Vps4aDN*), 317 (*Vps4aDN*). Data are presented as mean  $\pm$  SEM, \*\*\* $P < 0.0001$  compared to GFP; ### $P < 0.001$  compared to *Satb2*.

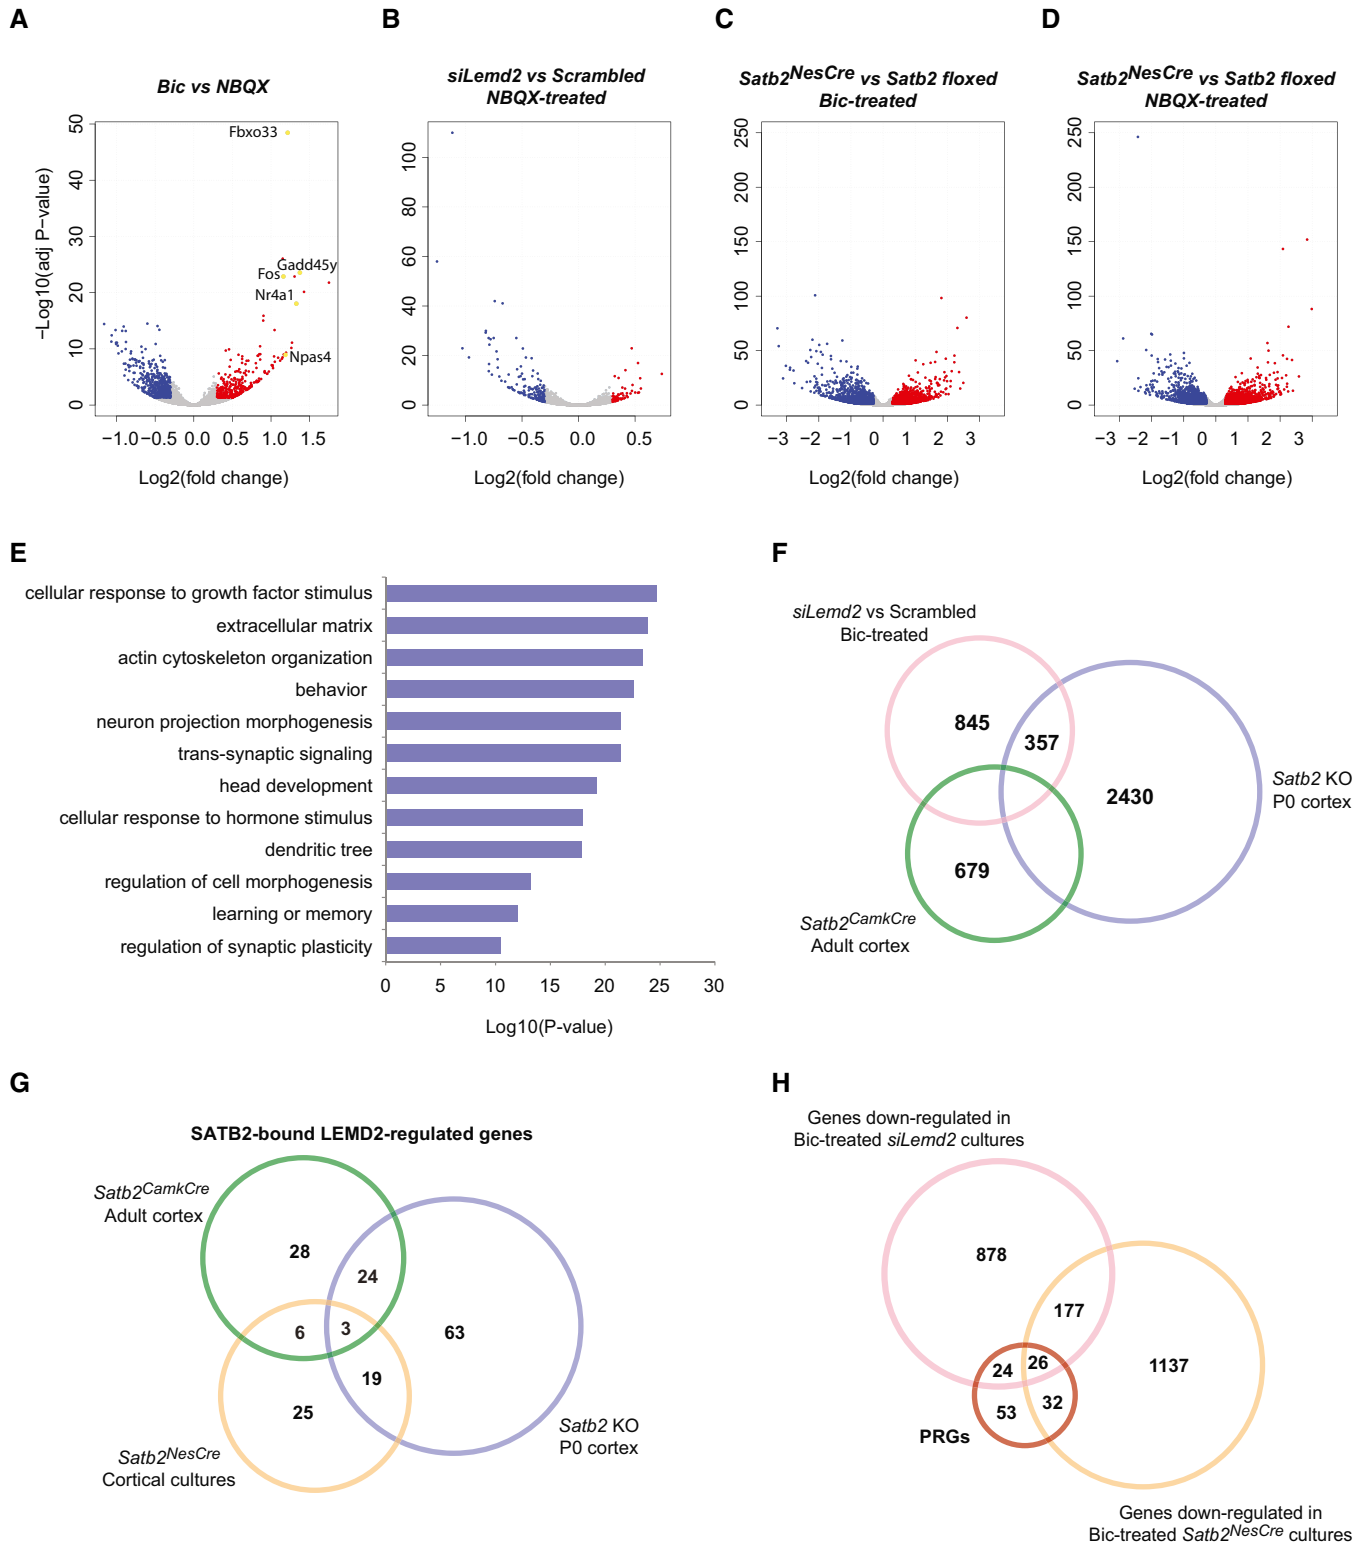

Figure EV4.

**Figure EV4. LEMD2 and SATB2 coregulate neuronal gene transcription.**

- A “Volcano plot” of statistical significance against fold change (FC) between silenced (NBQX-treated) and active (Bic-treated) primary cortical cultures from *Satb2* floxed mice. The differentially expressed genes (adjusted  $P$ -value  $< 0.05$ , 0.3 FC cut-off) are indicated in red (up-regulated) and in blue (down-regulated),  $n = 5$ – $7$  independent primary cultures. Examples of some IEGs strongly up-regulated upon Bic treatment are marked and highlighted in yellow.
- B–D “Volcano plots” illustrating the differential gene expression between NBQX-treated *siLemd2*- vs scrambled siRNA-transfected cortical cultures (B), Bic-treated *Satb2<sup>NesCre</sup>* vs *Satb2* floxed cultures (C), and NBQX-treated *Satb2<sup>NesCre</sup>* vs *Satb2* floxed cultures (D). The differentially expressed genes (adjusted  $P$ -value  $< 0.05$ , 0.3 FC cut-off) are indicated in red (up-regulated) and in blue (down-regulated),  $n = 3$ – $7$  independent primary cultures.
- E GO enrichment analysis of differentially expressed genes between *siLemd2*- and scrambled siRNA-transfected Bic-treated cultures.
- F Venn diagram illustrating the overlap between the differentially expressed genes (adjusted  $P$ -value  $< 0.05$ , 0.3 FC cut-off) in *siLemd2*- vs scrambled siRNA-transfected cultures, SATB2-deficient vs wild-type P0 cortices (Fischer’s exact test,  $P$ -value  $< 1E-15$ , OR = 2.93), and *Satb2<sup>CamkCre</sup>* vs *Satb2* floxed adult cortices (Fischer’s exact test,  $P$ -value  $< 1E-15$ , OR = 3.54).
- G Venn diagram of SATB2-bound LEMD2-regulated genes specific to or shared by the differentially expressed genes in *Satb2<sup>NesCre</sup>* cortical neurons (Fischer’s exact test,  $P$ -value  $< 1E-15$ , OR = 3.059), P0 cortex (Fischer’s exact test,  $P$ -value  $< 1E-15$ , OR = 2.627), and adult cortex (Fischer’s exact test,  $P$ -value  $< 1E-15$ , OR = 2.962).
- H Venn diagram showing the overlap between rapid and delayed PRG (Tyssowski *et al*, 2018) and the genes down-regulated in Bic-stimulated *Satb2<sup>NesCre</sup>* CKO (Fischer’s exact test,  $P$ -value  $< 1E-15$ , OR = 9.99) and *siLemd2*-silenced cultures (Fischer’s exact test,  $P$ -value  $< 1E-15$ , OR = 10.17).
